# Supplementary material for: Nuclear WRAP53 promotes neuronal survival and functional recovery after stroke
Source: PubMed Central journal article supplement — Sci Adv. 2020 Oct 7;6(41):eabc5702. doi: 10.1126/sciadv.abc5702 (PMC7541066; doi:10.1126/sciadv.abc5702), 2020-10-07
Supplement: abc5702_Data_file_S2.pdf [file abc5702_Data_file_S2.pdf]

| Figure | Conditions                                                    | "n" (per group) | Analysis (Post-hoc test)   | F Values (DFn,DFd) P value / t-ratio df | Factors analyzed                    | p Values |
|--------|---------------------------------------------------------------|-----------------|----------------------------|-----------------------------------------|-------------------------------------|----------|
| 1B     | NMX vs OGD (0h, 2h, 4h, 8h & 24h after OGD)                   | 3               | Two-way ANOVA (Bonferroni) | F(4,19)=4.66 P=0.0086                   | NMX 8h vs OGD 8h                    | 0.0282   |
| 1D     | NMX vs OGD (8h after OGD)                                     | 3               | Student's t test           | t-ratio=4.244 df=4                      | NMX vs OGD                          | 0.0132   |
| 2B     | siControl vs siWrap53. NMX vs OGD (4h & 8h after OGD)         | 3               | Two-way ANOVA (Bonferroni) | F(2,12)=4.47 P=0.0354                   | OGD 8h siControl vs OGD 8h siWrap53 | 0.0009   |
| 2C     | siControl vs siWrap53. NMX vs OGD (4h & 8h after OGD)         | 3               | Two-way ANOVA (Bonferroni) | F(3,16)=16.36 P<0.0001                  | OGD 4h siControl vs OGD 4h siWrap53 | 0.0450   |
|        |                                                               |                 |                            |                                         | OGD 8h siControl vs OGD 8h siWrap53 | <0.0001  |
| 2D     | siControl vs siWrap53. NMX vs OGD (0h, 2h, 4h & 8h after OGD) | 3               | Two-way ANOVA (Bonferroni) | F(6,21)=5.231 P=0.0020                  | OGD 8h siControl vs OGD 8h siWrap53 | 0.0424   |
| 3A     | NMX vs OGD (8h after OGD)                                     | 4               | Student's t test           | t-ratio=4.786 df=6                      | NMX vs OGD                          | 0.0030   |
| 3C     | GFP vs GFP-WRAP53. NMX vs OGD (4h & 8h after OGD)             | 3               | Two-way ANOVA (Bonferroni) | F(2,12)=15.01 P=0.0005                  | NMX GFP vs OGD 4h GFP               | 0.0005   |
|        |                                                               |                 |                            |                                         | NMX GFP vs OGD 8h GFP               | <0.0001  |

|    |                                                              |                                                              |                            |                            |                                               |                                   |        |
|----|--------------------------------------------------------------|--------------------------------------------------------------|----------------------------|----------------------------|-----------------------------------------------|-----------------------------------|--------|
|    |                                                              |                                                              |                            |                            | OGD 4h GFP vs<br>OGD 4h GFP-<br>WRAP53        | 0.0008                            |        |
|    |                                                              |                                                              |                            |                            | OGD 8h GFP vs<br>OGD 8h GFP-<br>WRAP53        | 0.0001                            |        |
| 3D | MT-GFP vs MT-<br>GFP-WRAP53.<br>NMX vs OGD (4h<br>after OGD) | 3                                                            | Two-way ANOVA (Bonferroni) | F (1,8)=4.539 P=0.0658     | NMX MT-GFP vs<br>OGD MT-GFP                   | 0.0034                            |        |
|    |                                                              |                                                              |                            |                            | NMX MT-GFP-<br>WRAP53 vs OGD<br>MT-GFP-WRAP53 | 0.0002                            |        |
|    |                                                              |                                                              |                            |                            | OGD MT-GFP vs<br>OGD MT-GFP-<br>WRAP53        | ns 0.0615                         |        |
| 4A | 53BP1<br>foci+ cells                                         | siControl vs<br>siWrap53. NMX<br>vs OGD (8h after<br>OGD)    | 3                          | Two-way ANOVA (Bonferroni) | F(1,8)=2.837 P=0.1306                         | NMX siControl vs<br>OGD siControl | 0.0044 |
|    |                                                              |                                                              |                            |                            | OGD siControl vs<br>OGD siWrap53              | 0.0346                            |        |
| 4A | $\gamma$ H2AX<br>foci+/<br>53BP1 foci-<br>cells              | siControl vs<br>siWrap53. NMX<br>vs OGD (8h after<br>OGD)    | 3                          | Two-way ANOVA (Bonferroni) | F(1,8)=0.6949 P=0.4287                        | OGD siControl vs<br>OGD siWrap53  | 0.0159 |
| 4B | 53BP1<br>foci+ cells                                         | GFP vs GFP-<br>WRAP53 vs MT-<br>GFP-WRAP53<br>(8h after OGD) | 3                          | One-way ANOVA (Bonferroni) | F(2,6)=54.63 P=0.0001                         | GFP vs GFP-<br>WRAP53             | 0.0009 |
|    |                                                              |                                                              |                            |                            | GFP-WRAP53 vs<br>MT-GFP-WRAP53                | 0.0002                            |        |

|    |                                              |                                                   |   |                            |                        |                               |            |
|----|----------------------------------------------|---------------------------------------------------|---|----------------------------|------------------------|-------------------------------|------------|
|    |                                              |                                                   |   |                            |                        | GFP vs MT-GFP-WRAP53          | ns 0.1367  |
| 4B | $\gamma$ H2AX foci+/<br>53BP1 foci-<br>cells | GFP vs GFP-WRAP53 vs MT-GFP-WRAP53 (8h after OGD) | 3 | One-way ANOVA (Bonferroni) | F(2,6)=13.85 P=0.0056  | GFP vs GFP-WRAP53             | 0.0185     |
|    |                                              |                                                   |   |                            |                        | GFP-WRAP53 vs MT-GFP-WRAP53   | 0.0058     |
|    |                                              |                                                   |   |                            |                        | GFP vs MT-GFP-WRAP53          | ns 0.5499  |
| 6A |                                              | SNAP vs MitoSNO. NMX vs OGD (2h & 4h after OGD)   | 3 | Two-way ANOVA (Bonferroni) | F(3,16)=3.522 P=0.0393 | OGD 4h SNAP vs OGD 4h MitoSNO | 0.0056     |
| 7A |                                              | wt vs mCAT. Contra vs Ipsi                        | 3 | Two-way ANOVA (Bonferroni) | F(1,8)=9.749 P=0.0142  | wt Contra vs wt Ipsi          | 0.0388     |
|    |                                              |                                                   |   |                            |                        | mCAT Contra vs mCAT Ipsi      | ns >0.9999 |
| 7B |                                              | wt vs mCAT. Contra vs Ipsi                        | 4 | Two-way ANOVA (Bonferroni) | F(1,12)=2.835 P=0.1180 | wt Contra vs wt Ipsi          | 0.0246     |
|    |                                              |                                                   |   |                            |                        | mCAT Contra vs mCAT Ipsi      | ns >0.9999 |

| Figure            | Conditions                                       | "n" per group | Analysis (Post-hoc test)   | F Values (DFn,DFd) P value / t-ratio df | F-ratios                    | p-Values   |
|-------------------|--------------------------------------------------|---------------|----------------------------|-----------------------------------------|-----------------------------|------------|
| S1A $\gamma$ H2AX | NMX vs OGD (0h, 2h, 4h, 8h, 18h, 24h after OGD)  | 3             | One-way ANOVA (Bonferroni) | F(6,13)=30.47 P<0.0001                  | NMX vs OGD 8h               | <0.0001    |
|                   |                                                  |               |                            |                                         | NMX vs OGD 18h              | 0.0002     |
|                   |                                                  |               |                            |                                         | NMX vs OGD 24h              | <0.0001    |
| S1A WRAP53        | NMX vs OGD (0h, 2h, 4h, 8h, 18h & 24h after OGD) | 4             | One-way ANOVA (Bonferroni) | F(6,20)=19.12 P<0.0001                  | NMX vs OGD 8h               | 0.0230     |
|                   |                                                  |               |                            |                                         | NMX vs OGD 18h              | <0.0001    |
|                   |                                                  |               |                            |                                         | NMX vs OGD 24h              | 0.0005     |
| S1B               | NMX vs OGD (0h, 2h, 4h, 8h & 24h after OGD)      | 2-3           | Two-way ANOVA (Bonferroni) | F(4,15)=1.614 P=0.2223                  | NMX 0h vs OGD 0h            | ns >0.9999 |
|                   |                                                  |               |                            |                                         | NMX 2h vs OGD 2h            | ns >0.9999 |
|                   |                                                  |               |                            |                                         | NMX 4h vs OGD 4h            | ns >0.9999 |
|                   |                                                  |               |                            |                                         | NMX 8h vs OGD 8h            | ns >0.9999 |
|                   |                                                  |               |                            |                                         | NMX 24h vs OGD 24h          | ns >0.9999 |
| S1D Nucleus       | NMX vs OGD (8h after OGD)                        | 3             | Student's t test           | t-ratio=3.278 df=4                      | NMX vs OGD                  | 0.0306     |
| S1D Cytosol       | NMX vs OGD (8h after OGD)                        | 3             | Student's t test           | t-ratio=4.32 df=4                       | NMX vs OGD                  | 0.0125     |
| S2A               | siControl vs siWrap53#1 24h                      | 3             | Student's t test           | t-ratio=3.979 df=4                      | siControl vs siWrap53#1 24h | 0.0164     |
|                   | siControl vs siWrap53#1 48h                      | 3             | Student's t test           | t-ratio=4.397 df=4                      | siControl vs siWrap53#1 48h | 0.0117     |

|     |                                                                           |   |                            |                        |                                           |         |
|-----|---------------------------------------------------------------------------|---|----------------------------|------------------------|-------------------------------------------|---------|
|     | siControl vs<br>siWrap53#2 24h                                            | 3 | Student's t test           | t-ratio=6.532 df=4     | siControl vs<br>siWrap53#2 24h            | 0.0028  |
|     | siControl vs<br>siWrap53#2 48h                                            | 3 | Student's t test           | t-ratio=5.366 df=4     | siControl vs<br>siWrap53#2 48h            | 0.0058  |
|     | siControl vs<br>siWrap53#2 72h                                            | 3 | Student's t test           | t-ratio=5.118 df=4     | siControl vs<br>siWrap53#2 72h            | 0.0069  |
| S2B | siControl vs<br>siWrap53                                                  | 3 | Student's t test           | t-ratio=6.653 df=4     | siControl vs<br>siWrap53                  | 0.0027  |
| S2C | siControl vs<br>siWrap53. NMX<br>vs OGD (0h, 2h,<br>4h & 8h after<br>OGD) | 3 | Two-way ANOVA (Bonferroni) | F(4,20)=3.613 P=0.0226 | NMX siControl vs<br>OGD 4h siControl      | <0.0001 |
|     |                                                                           |   |                            |                        | NMX siControl vs<br>OGD 8h siControl      | <0.0001 |
|     |                                                                           |   |                            |                        | NMX siWrap53 vs<br>OGD 2h siWrap53        | 0.0014  |
|     |                                                                           |   |                            |                        | NMX siWrap53 vs<br>OGD 4h siWrap53        | <0.0001 |
|     |                                                                           |   |                            |                        | NMX siWrap53 vs<br>OGD 8h siWrap53        | <0.0001 |
|     |                                                                           |   |                            |                        | OGD 2h siControl<br>vs OGD 2h<br>siWrap53 | 0.0003  |
| S2D | siControl vs<br>siWrap53. NMX<br>vs OGD (0h, 2h,<br>4h & 8h after<br>OGD) | 3 | Two-way ANOVA (Bonferroni) | F(4,20)=5.314 P=0.0044 | NMX siControl vs<br>OGD 4h siControl      | 0.0042  |
|     |                                                                           |   |                            |                        | NMX siControl vs<br>OGD 8h siControl      | <0.0001 |
|     |                                                                           |   |                            |                        | NMX siWrap53 vs<br>OGD 4h siWrap53        | <0.0001 |

|     |                                                               |   |                            |                         |  |                                     |            |
|-----|---------------------------------------------------------------|---|----------------------------|-------------------------|--|-------------------------------------|------------|
|     |                                                               |   |                            |                         |  | NMX siWrap53 vs OGD 8h siWrap53     | <0.0001    |
|     |                                                               |   |                            |                         |  | OGD 4h siControl vs OGD 4h siWrap53 | 0.0027     |
| S2E | siControl vs siWrap53. NMX vs OGD (0h, 2h, 4h & 8h after OGD) | 3 | Two-way ANOVA (Bonferroni) | F(9,30)=0.6379 P=0.7558 |  | OGD 0h siControl vs OGD 0h siWrap53 | ns >0.9999 |
|     |                                                               |   |                            |                         |  | OGD 2h siControl vs OGD 2h siWrap53 | ns >0.9999 |
|     |                                                               |   |                            |                         |  | OGD 4h siControl vs OGD 4h siWrap53 | ns >0.9999 |
|     |                                                               |   |                            |                         |  | OGD 8h siControl vs OGD 8h siWrap53 | ns >0.9999 |
| S2F | NMX vs OGD (4h after OGD)                                     | 3 | Student's t test           | t-ratio=3.666 df=4      |  | NMX vs OGD                          | 0.0215     |
| S3B | GFP vs GFP-WRAP53. NMX vs OGD (8h after OGD)                  | 4 | Two-way ANOVA (Bonferroni) | F(1,12)=16.56 P=0.0016  |  | NMX GFP-WRAP53 vs OGD GFP-WRAP53    | 0.0005     |
|     |                                                               |   |                            |                         |  | NMX GFP vs NMX GFP-WRAP53           | <0.0001    |
|     |                                                               |   |                            |                         |  | OGD GFP vs OGD GFP-WRAP53           | 0.0250     |
| S3F | MT-GFP vs MT-GFP-WRAP53. NMX vs OGD (8h after OGD)            | 4 | Two-way ANOVA (Bonferroni) | F(1,12)=0.0068 P=0.9356 |  | NMX MT-GFP vs NMX MT-GFP-WRAP53     | ns >0.9999 |

|                                                                   |                                                    |   |                            |                           |  |                                        |            |
|-------------------------------------------------------------------|----------------------------------------------------|---|----------------------------|---------------------------|--|----------------------------------------|------------|
|                                                                   |                                                    |   |                            |                           |  | NMX MT-GFP vs OGD MT-GFP               | ns >0.9999 |
|                                                                   |                                                    |   |                            |                           |  | NMX MT-GFP-WRAP53 vs OGD MT-GFP-WRAP53 | ns >0.9999 |
|                                                                   |                                                    |   |                            |                           |  | OGD MT-GFP-WRAP53 vs OGD MT-GFP-WRAP53 | ns >0.9999 |
| S4 53BP1 foci <sup>+</sup> cells                                  | GFP vs GFP-WRAP53 vs MT-GFP-WRAP53 (18h after OGD) | 3 | One-way ANOVA (Bonferroni) | F (2, 6) = 2.279 P=0.1835 |  | GFP vs GFP-WRAP53                      | ns 0.2558  |
|                                                                   |                                                    |   |                            |                           |  | GFP-WRAP53 vs MT-GFP-WRAP53            | ns 0.5381  |
|                                                                   |                                                    |   |                            |                           |  | GFP vs MT-GFP-WRAP53                   | ns >0.9999 |
| S4 $\gamma$ H2AX foci <sup>+</sup> /53BP1 foci <sup>-</sup> cells | GFP vs GFP-WRAP53 vs MT-GFP-WRAP53 (18h after OGD) | 3 | One-way ANOVA (Bonferroni) | F (2, 6) = 3.642 P=0.0921 |  | GFP vs GFP-WRAP53                      | ns 0.8396  |
|                                                                   |                                                    |   |                            |                           |  | GFP-WRAP53 vs MT-GFP-WRAP53            | ns 0.1078  |
|                                                                   |                                                    |   |                            |                           |  | GFP vs MT-GFP-Wrap53                   | ns 0.5489  |
| S5A                                                               | siControl vs si53BP1. NMX vs OGD (8h after OGD)    | 3 | Two-way ANOVA (Bonferroni) | F(1,8)=44.82 P=0.0002     |  | NMX siControl vs OGD siControl         | 0.0026     |
|                                                                   |                                                    |   |                            |                           |  | NMX si53BP1 vs OGD si53BP1             | <0.0001    |
|                                                                   |                                                    |   |                            |                           |  | OGD siControl vs OGD si53BP1           | 0.0002     |

|                     |                                                                      |   |                            |                        |                                                        |            |
|---------------------|----------------------------------------------------------------------|---|----------------------------|------------------------|--------------------------------------------------------|------------|
| S5B<br>Camptothecin | Camptothecin<br>0 $\mu$ M vs<br>Camptothecin<br>1 $\mu$ M            | 3 | Student's t test           | t-ratio=2.672 df=4     | Camptothecin 0 $\mu$ M<br>vs Camptothecin<br>1 $\mu$ M | ns 0.0557  |
| S5B<br>Rotenone     | Rotenone 0 $\mu$ M vs<br>Rotenone 1 $\mu$ M vs<br>Rotenone 2 $\mu$ M | 3 | One-way ANOVA (Bonferroni) | F(2,6)=15.69 P=0.0041  | Rotenone 0 $\mu$ M vs<br>Rotenone 1 $\mu$ M            | 0.0283     |
|                     |                                                                      |   |                            |                        | Rotenone 0 $\mu$ M vs<br>Rotenone 2 $\mu$ M            | 0.0046     |
|                     |                                                                      |   |                            |                        | Rotenone 1 $\mu$ M vs<br>Rotenone 2 $\mu$ M            | ns 0.4084  |
| S5C                 | NMX vs OGD vs<br>Rotenone vs<br>Camptothecin                         | 4 | One-way ANOVA (Bonferroni) | F(3,12)=38.72 P<0.0001 | NMX vs OGD                                             | 0.0001     |
|                     |                                                                      |   |                            |                        | NMX vs Rotenone                                        | <0.0001    |
|                     |                                                                      |   |                            |                        | NMX vs<br>Camptothecin                                 | ns 0.7762  |
|                     |                                                                      |   |                            |                        | OGD vs Rotenone                                        | ns 0.1129  |
| S5D                 | SNAP vs<br>MitoSNO. NMX<br>vs OGD (2h & 4h<br>after OGD)             | 3 | Two-way ANOVA (Bonferroni) | F(2,12)=5.278 P=0.0227 | NMX SNAP vs OGD<br>SNAP 4h                             | 0.0395     |
|                     |                                                                      |   |                            |                        | NMX MitoSNO vs<br>OGD MitoSNO 4h                       | ns >0.9999 |
| S5E                 | NMX vs OGD<br>SNAP vs OGD<br>MitoSNO                                 | 3 | One-way ANOVA (Bonferroni) | F(2,6)=29.6 P=0.0008   | NMX vs OGD SNAP                                        | 0.0006     |
|                     |                                                                      |   |                            |                        | NMX vs OGD<br>MitoSNO                                  | 0.0405     |
|                     |                                                                      |   |                            |                        | OGD SNAP vs OGD<br>MitoSNO                             | 0.0106     |



|     |                                                         |   |                            |                        |                                           |           |
|-----|---------------------------------------------------------|---|----------------------------|------------------------|-------------------------------------------|-----------|
| S6B | WRAP53-Arg <sup>68</sup> vs<br>WRAP53-Gly <sup>68</sup> | 4 | Two-way ANOVA (Bonferroni) | F(2,18)=3.256 P=0.0621 | NMX WRAP53-Arg <sup>68</sup> vs OGD 8h    | 0.0004    |
|     |                                                         |   |                            |                        | WRAP53-Arg <sup>68</sup>                  |           |
|     |                                                         |   |                            |                        | NMX WRAP53-Gly <sup>68</sup> vs OGD 8h    | 0.0492    |
|     |                                                         |   |                            |                        | WRAP53-Gly <sup>68</sup>                  |           |
|     |                                                         |   |                            |                        | OGD 4h WRAP53-Arg <sup>68</sup> vs OGD 8h | 0.0004    |
|     |                                                         |   |                            |                        | WRAP53-Arg <sup>68</sup>                  |           |
|     |                                                         |   |                            |                        | OGD 4h WRAP53-Gly <sup>68</sup> vs OGD 8h | ns 0.9038 |
|     |                                                         |   |                            |                        | WRAP53-Gly <sup>68</sup>                  |           |
