# Supplementary material for: Nuclear WRAP53 promotes neuronal survival and functional recovery after stroke
Source: PubMed Central journal article supplement — Sci Adv. 2020 Oct 7;6(41):eabc5702. doi: 10.1126/sciadv.abc5702 (PMC7541066; doi:10.1126/sciadv.abc5702), 2020-10-07
Supplement: abc5702_SM.pdf [file abc5702_SM.pdf]

[advances.sciencemag.org/cgi/content/full/6/41/eabc5702/DC1](https://advances.sciencemag.org/cgi/content/full/6/41/eabc5702/DC1)

## Supplementary Materials for

### **Nuclear WRAP53 promotes neuronal survival and functional recovery after stroke**

Irene Sánchez-Morán, Cristina Rodríguez, Rebeca Lapresa, Jesús Agulla, Tomás Sobrino,  
José Castillo, Juan P. Bolaños, Angeles Almeida\*

\*Corresponding author. Email: [aaparra@usal.es](mailto:aaparra@usal.es)

Published 7 October 2020, *Sci. Adv.* **6**, eabc5702 (2020)  
DOI: 10.1126/sciadv.abc5702

#### **The PDF file includes:**

Figs. S1 to S6  
Tables S1 to S4

#### **Other Supplementary Material for this manuscript includes the following:**

(available at [advances.sciencemag.org/cgi/content/full/6/41/eabc5702/DC1](https://advances.sciencemag.org/cgi/content/full/6/41/eabc5702/DC1))

Data S1 and S2

**Supplementary Figure 1 (Fig. S1)**

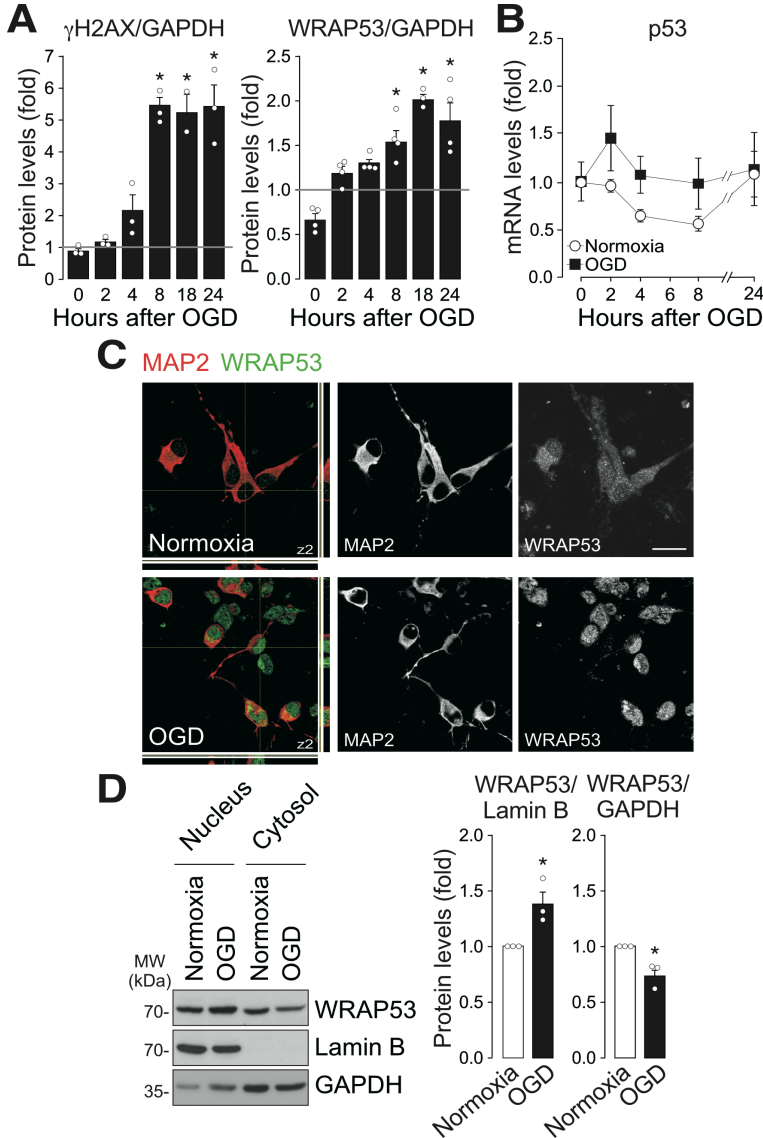

**Fig. S1. Oxygen and glucose deprivation (OGD) induces WRAP53 upregulation and nuclear translocation in neurons.** **A.** Results of the protein abundance quantification of proteins shown in Fig. 1C. OGD increased  $\gamma$ H2AX and WRAP53 protein levels in neurons. The error bars are standard error deviation from 3-4 different neuronal cultures (\* $p < 0.05$  versus Normoxia; one-way ANOVA followed by the Bonferroni *post hoc* test). **B.** p53 mRNA remained unchanged after OGD. The error bars are standard error deviation from 3 different neuronal cultures (\* $p < 0.05$  versus Normoxia; two-way ANOVA followed by the Bonferroni

*post hoc* test). **C.** Orthogonal view showing WRAP53 translocation into the nucleus at 8 hours after OGD (Scale bar = 25  $\mu$ m). **D.** Western blot analysis confirming WRAP53 accumulation in neuronal nuclei at 8 hours after OGD. Quantifications of the nuclear and cytosolic WRAP53 abundance. The error bars are standard error deviation from 3 different neuronal cultures (\* $p < 0.05$  versus Normoxia; Student's *t* test).

**Supplementary Figure 2 (Fig. S2)**

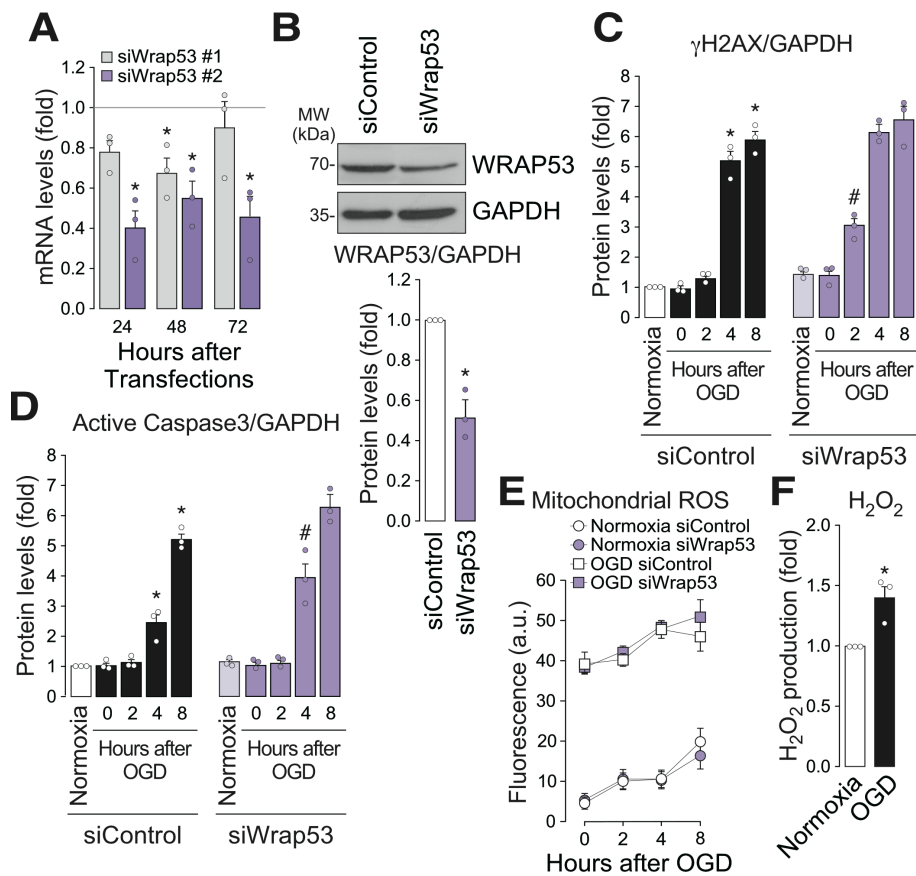

**Fig. S2. WRAP53 loss renders neurons vulnerable to DNA damage and apoptosis after oxygen and glucose deprivation (OGD).** **A, B.** WRAP53 knockdown by siRNA (siWrap53#1, and siWrap53#2 or siWrap53) transfection for 2 days triggers  $\gamma$ H2AX and active Caspase-3 accumulation in neurons. The error bars are standard error deviation from 3 different neuronal cultures (\*p < 0.05 *versus* siControl; Student's *t* test). **C, D.** Results of the protein abundance quantification of proteins shown in Fig. 2A. The error bars are standard error deviation from 3 different neuronal cultures (\*p < 0.05 *versus* Normoxia; #p < 0.05 *versus* siControl OGD; two-way ANOVA followed by the Bonferroni *post hoc* test). **E, F.** OGD-induced mitochondrial ROS generation and hydrogen peroxide (H<sub>2</sub>O<sub>2</sub>) production. The error bars are standard error deviation from 3 different neuronal cultures (\*p < 0.05 *versus* Normoxia; Student's *t* test).

### Supplementary Figure 3 (Fig. S3)

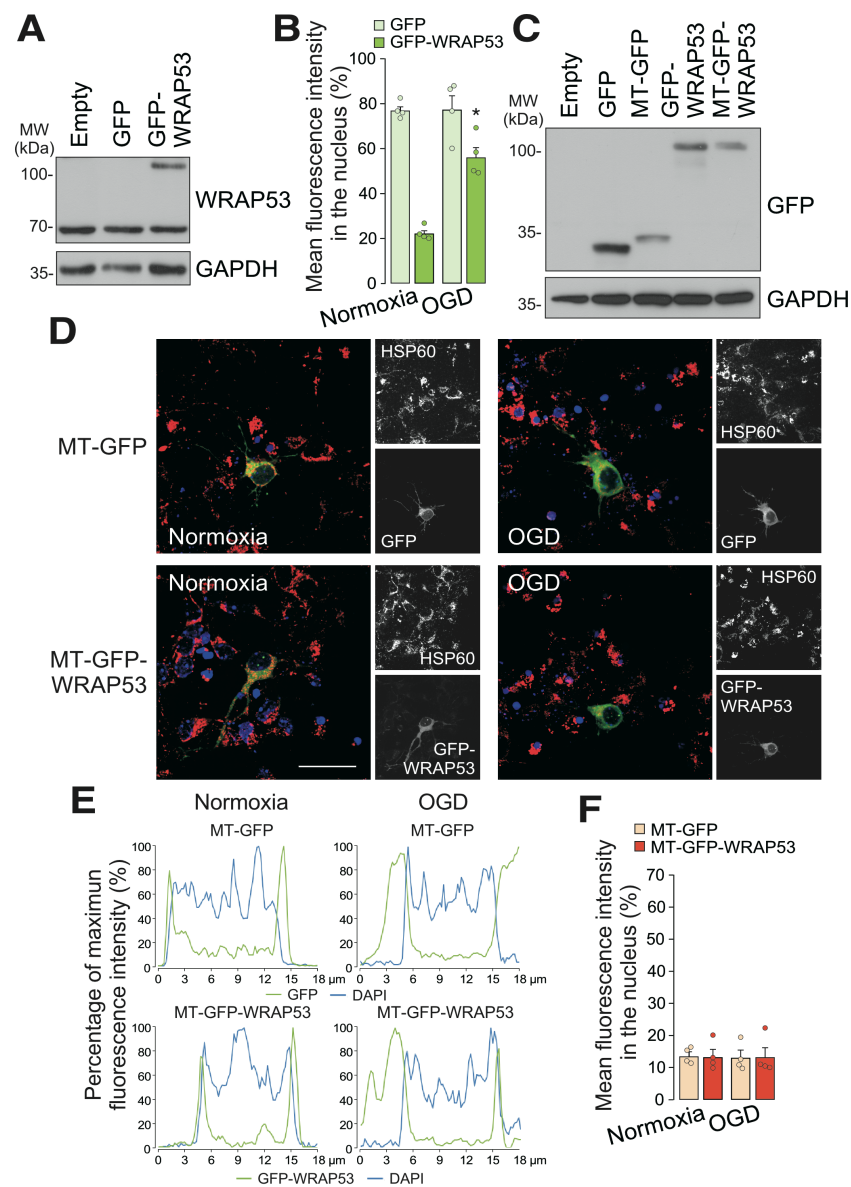

**Fig. S3. WRAP53 recruitment in the cytosol prevents neuroprotection.** **A, B.** Neurons were transfected with plasmids encoding GFP and GFP-WRAP53. **A.** Western blot image showing ectopic expression of GFP-WRAP53. **B.** Results of the mean fluorescence intensity of GFP and GFP-WRAP53 within the nucleus. The error bars are standard error deviation from 4 different neuronal cultures (10-15 GFP<sup>+</sup> neurons per culture. \* $p < 0.05$  versus Normoxia; two-way ANOVA followed by the Bonferroni *post hoc* test). **C-F.** Neurons were transfected with plasmids encoding GFP (MT-GFP) and GFP-WRAP53 (MT-GFP-WRAP53) fused to a

mitochondrial-targeting (MT) sequence of human ornithine transcarbamylase for 24 hours and were subjected to oxygen and glucose deprivation (OGD). **C.** Western blot image showing ectopic expression of GFP. **D.** Representative image of cortical neurons stained with GFP and HSP60 (mitochondrial marker). Scale bar = 25  $\mu$ m. **E.** Representative cross-sectional intensity profiles for GFP (green) and DAPI (blue) staining of MT-GFP and MT-GFP-WRAP53-transfected neurons. **F.** Results of the mean fluorescence intensity of MT-GFP and MT-GFP-WRAP53 within the nucleus. The error bars are standard error deviation from 4 different neuronal cultures (10-15 GFP<sup>+</sup> neurons per culture).

**Supplementary Figure 4 (Fig. S4)**

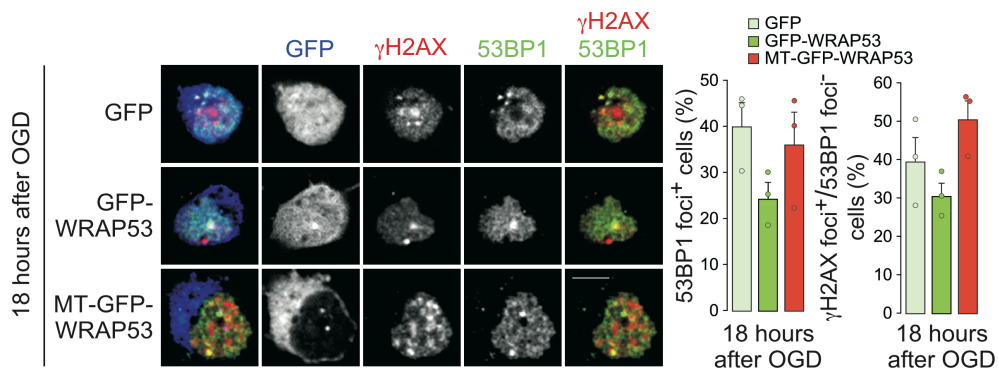

**Fig. S4. Nuclear accumulation of WRAP53 promoted double-strand break (DSB) repair at 18 hours after oxygen and glucose deprivation (OGD).** Neurons were transfected with plasmids encoding GFP, GFP-WRAP53 and MT-GFP-WRAP53 (MT: mitochondrial-targeting sequence) for 24 hours and were subjected to oxygen and glucose deprivation (OGD), as indicated in Fig. 1. Neurons were immunostained for GFP,  $\gamma$ H2AX and 53BP1 at 18 hours after OGD. Representative images are shown. Scale bar = 5  $\mu$ m. Quantification of 53BP1 foci positive neurons (percentage of neurons costaining  $\gamma$ H2AX and 53BP1 foci) and percentage of  $\gamma$ H2AX foci-positive and 53BP1 foci-negative neurons. The error bars are standard error deviation from 3 different neuronal cultures (10-12 GFP<sup>+</sup> neurons per culture).

## Supplementary Figure 5 (Fig. S5)

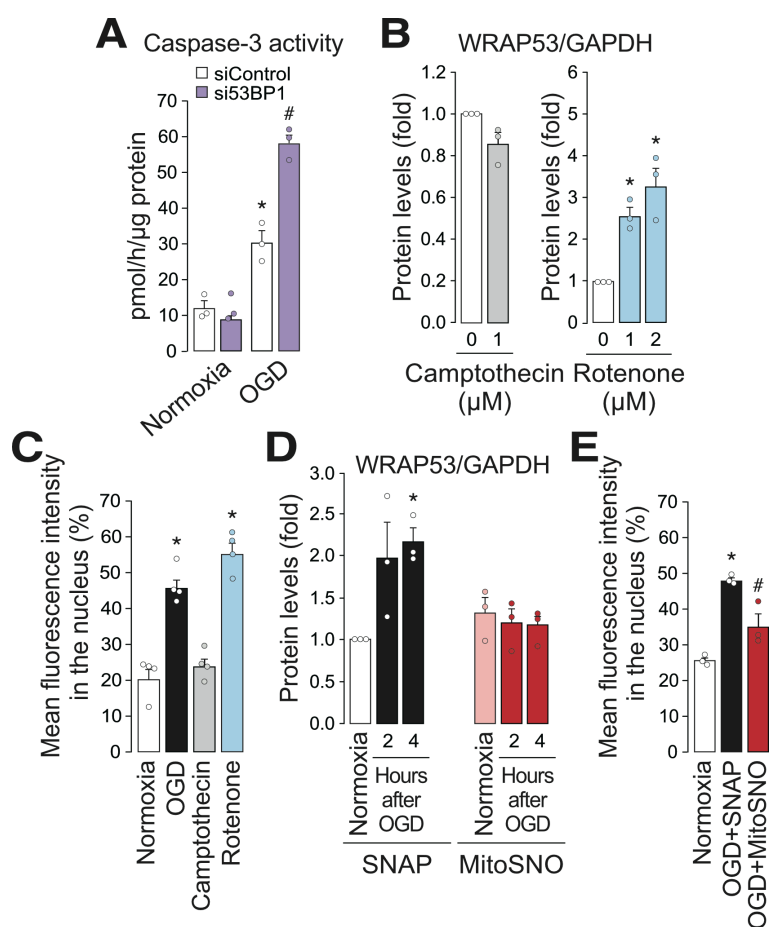

**Fig. S5. Mitochondrial ROS generation promotes WRAP53 upregulation and nuclear translocation in neurons.** **A.** Analysis of caspase-3 activity in siControl and si53BP1 transfected neurons performed at 8 hours after oxygen and glucose deprivation (OGD). The error bars are standard error deviation from 3 different neuronal cultures (\* $p < 0.05$  versus Normoxia; # $p < 0.05$  versus OGD siControl; two-way ANOVA followed by the Bonferroni *post hoc* test). **B.** Results of the protein abundance quantification of proteins shown in Fig. 5A and B. The error bars are standard error deviation from 3 different neuronal cultures (\* $p < 0.05$  versus absence of treatment; one-way ANOVA followed by the Bonferroni *post hoc* test). **C.** Results of the mean fluorescence intensity of GFP-WRAP53 within the nucleus. The error bars are standard error deviation from 4 different neuronal cultures (10-15 GFP<sup>+</sup> neurons per culture. \* $p < 0.05$  versus Normoxia; one-way ANOVA followed by the Bonferroni *post hoc* test). **D.**



Results of the WRAP53 protein abundance quantification of proteins shown in Fig. 6B, after treatment with SNAP (*S*-nitroso-*N*-acetyl penicillamine) or the mitochondrial ROS production inhibitor MitoSNO (mitochondria-selective *S*-nitrosating agent). The error bars are standard error deviation from 3 different neuronal cultures (\* $p < 0.05$  versus Normoxia; two-way ANOVA followed by the Bonferroni *post hoc* test). **E.** Results of the mean fluorescence intensity of GFP-WRAP53 within the nucleus. The error bars are standard error deviation from 3 different neuronal cultures (10-12 GFP<sup>+</sup> neurons per culture. \* $p < 0.05$  versus Normoxia; # $p < 0.05$  versus OGD+SNAP; one-way ANOVA followed by the Bonferroni *post hoc* test).

**Supplementary Figure 6 (Fig. S6)**

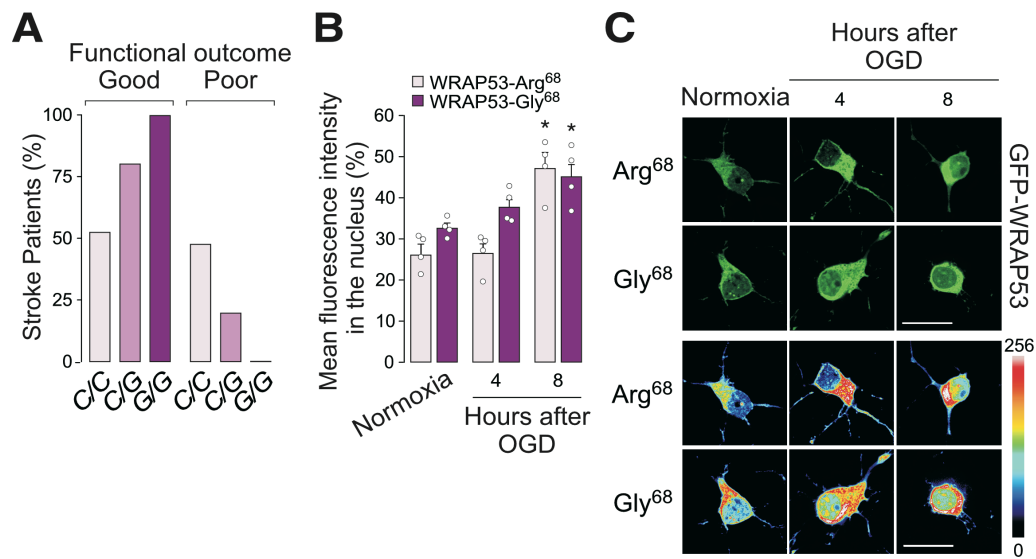

**Fig S6. The *Wrap53* C>G SNP (rs2287499) enhanced WRAP53 nuclear accumulation and functional recovery after stroke.** **A.** Stroke patients (n = 408; rs2287499 C/C: 311; C/G: 87; G/G: 10) were matched by good (mRS  $\leq$  2) and poor (mRS > 2) functional outcome, by using the modified Ranking scale (mRS), with indicated *Wrap53* genotypes. **B.** Results of the mean fluorescence intensity of GFP-WRAP53 polymorphic variants Arg<sup>68</sup> and Gly<sup>68</sup> within the nucleus. The error bars are standard error deviation from 4 different neuronal cultures (10-12 GFP<sup>+</sup> neurons per culture. \*p<0.05 *versus* Normoxia; two-way ANOVA followed by the Bonferroni *post hoc* test). **C.** Heat maps of fluorescence intensity of GFP-WRAP53 Arg<sup>68</sup> and GFP-WRAP53 Gly<sup>68</sup>.

**Table S1. Demographic and clinical features of stroke patients**

| <b>Variables</b>                        | <b>Ischemic stroke<br/>(n=408)</b> |
|-----------------------------------------|------------------------------------|
| Age, years                              | 72.8 ± 12.1                        |
| Males, n (%)                            | 242 (59.3)                         |
| TOAST:                                  |                                    |
| - Cardioembolic, n (%)                  | 148 (36.3)                         |
| - Atherotrombotic, n (%)                | 38 (9.3)                           |
| - Lacunar, n (%)                        | 46 (11.3)                          |
| - Undetermined, n (%)                   | 167 (40.9)                         |
| - Others, n (%)                         | 9 (2.2)                            |
| NIHSS on admission                      | 5 [2, 11]                          |
| ASPECTS on admission                    | 10 [8, 10]                         |
| Infarct volume at day 4-7, mL           | 31.1 ± 58.7                        |
| Early neurological deterioration, n (%) | 43 (10.5)                          |
| mRS at 3 months                         | 2 [1, 4]                           |
| Poor prognosis at 3 months, n (%)       | 161 (39.5)                         |
| <i>Wrap53 C&gt;G SNP (rs2287499)</i>    |                                    |
| - C/C genotype, n (%)                   | 311 (76.2)                         |
| - C/G genotype, n (%)                   | 87 (21.3)                          |
| - G/G genotype, n (%)                   | 10 (2.5)                           |

Patients were admitted at the University Hospital of Santiago de Compostela (Galicia, Spain). Data are shown as number (%), means ± SD or medians [quartiles]. mRS: modified Rankin Scale; NIHSS: National Institute of Health Stroke Scale.

**Table S2. Univariate analysis of baseline variables according to functional outcome at 3 months in stroke patients**

|                                               | Stroke           |                  | <i>p</i> |
|-----------------------------------------------|------------------|------------------|----------|
|                                               | Good             | Poor             |          |
|                                               | outcome<br>n=247 | outcome<br>n=161 |          |
| Age, years                                    | 70.1 ± 11.7      | 78.8 ± 9.9       | <0.0001  |
| Males, %                                      | 68.0             | 46.0             | <0.0001  |
| Hypertension, %                               | 51.1             | 64.6             | 0.007    |
| Diabetes, %                                   | 27.1             | 24.8             | 0.347    |
| Smoking, %                                    | 17.4             | 8.1              | 0.005    |
| Heavy alcohol intake, %                       | 9.3              | 7.5              | 0.321    |
| Hyperlipidemia, %                             | 33.2             | 28.6             | 0.191    |
| Coronary disease, %                           | 13.8             | 14.3             | 0.496    |
| Atrial fibrillation, %                        | 14.6             | 24.8             | 0.007    |
| SBP on admission, mm Hg                       | 148.5 ± 25.9     | 155.6 ± 28.1     | 0.053    |
| DBP on admission, mm Hg                       | 81.7 ± 13.9      | 82.5 ± 14.7      | 0.708    |
| Maximum SBP at 24 hours, mm Hg                | 133.1 ± 23.2     | 145.8 ± 25.4     | <0.0001  |
| Maximum DBP at 24 hours, mm Hg                | 73.8 ± 12.1      | 76.7 ± 13.1      | 0.224    |
| Temperature on admission, °C                  | 36.3 ± 0.5       | 36.3 ± 0.5       | 0.296    |
| Maximum temperature at 24 hours, °C           | 36.3 ± 0.5       | 36.6 ± 0.5       | <0.0001  |
| Blood glucose on admission, mg/dL             | 133 ± 60.5       | 140 ± 60.6       | <0.0001  |
| Maximum blood glucose at 24 hours, mg/dL      | 121.1 ± 43.9     | 128.5 ± 56.5     | 0.052    |
| Leukocytes on admission, x10 <sup>3</sup> /mL | 8.2 ± 2.4        | 9.0 ± 2.8        | <0.0001  |

|                                                       |               |               |         |
|-------------------------------------------------------|---------------|---------------|---------|
| Platelet number on admission,<br>x10 <sup>3</sup> /mL | 231.1 ± 65.8  | 255.3 ± 70.0  | 0.045   |
| International normalized ratio on<br>admission        | 1.1 ± 0.3     | 1.1 ± 0.2     | 0.003   |
| Fibrinogen on admission, mg/dL                        | 452.9 ± 103.8 | 526.9 ± 130.7 | <0.0001 |
| hs-CRP on admission, mg/dL                            | 1.6 ± 2.4     | 4.6 ± 7.9     | <0.0001 |
| NIHSS on admission                                    | 3 [1, 5]      | 11 [6, 17]    | <0.0001 |
| Early neurological deterioration, %                   | 3 [1, 5]      | 11 [6, 17]    | <0.0001 |
| Infarct Volume at day 4-7, mL                         | 10.4 ± 16.0   | 58.8 ± 81.1   | <0.0001 |
| ASPECTS                                               | 10 [9, 10]    | 10 [7, 10]    | <0.0001 |
| TOAST                                                 |               |               | 0.056   |
| C/C genotype, %                                       | 67.6          | 89.4          | <0.0001 |

Functional outcome was evaluated at 3 months using the modified Rankin Scale (mRS); mRS score >2 was considered poor prognosis. Data are percentage, means ± SD or medians [quartiles]. Percentages were compared using the  $\chi^2$  test. Student's t test was used to compare continuous variables with normal distribution between the groups. Continuous variables without normal distribution (NIHSS) were compared using the Mann-Whitney test. SBP, systolic blood pressure; DBP, diastolic blood pressure; hs-CRP, high-sensitivity C-reactive protein; NIHSS, National Institute of Health Stroke Scale.

**Table S3. Multiple logistic regression analysis showing independent variables associated with poor functional outcome at 3 months (modified Rankin Scale > 2) after stroke**

|                                  | <b>Stroke</b> |               |                 |
|----------------------------------|---------------|---------------|-----------------|
|                                  | <b>OR</b>     | <b>95% CI</b> | <b><i>p</i></b> |
| Age                              | 1.04          | 1.01 - 1.07   | 0.003           |
| Infarct volume                   | 1.01          | 1.00 - 1.03   | 0.005           |
| NIHSS on admission               | 1.27          | 1.18 - 1.37   | <0.0001         |
| Early neurological deterioration | 12.84         | 3.84 - 42.84  | <0.0001         |
| C/C genotype                     | 2.95          | 1.01 - 4.21   | 0.001           |

OR, odds ratio; NIHSS, National Institutes of Health Stroke Scale.

**Table S4. Genotypes of stroke patients with poor functional outcome matched for infarct volume.**

| <b>Infract volume 4th - 7th day after stroke (mL)</b> | <b>N</b> | <b>C/C</b>    | <b>C/G + G/G</b> |
|-------------------------------------------------------|----------|---------------|------------------|
| 0 - 2                                                 | 112      | 22.1% (17/77) | 11.4% (4/35)     |
| 2 - 10                                                | 91       | 16.9% (11/65) | 15.4% (4/26)     |
| 10-28                                                 | 96       | 40.5% (30/74) | 9.1% (2/22)*     |
| ≥ 28                                                  | 100      | 89.7% (78/87) | 53.8% (7/13)*    |

Patients were admitted at the University Hospital of Santiago de Compostela (Galicia, Spain). Functional outcome was evaluated at 3 months after stroke, by using the modified Rankin Scale (mRS). Percentages represent number of patients with poor functional outcome (mRS >2) in relation with total patients per genotype matched for infarct volume. N is the number of stroke patients per infarct volume range. Percentages were compared between genotype groups using the  $\chi^2$  test (\*p = 0.003).
